# Supplementary material for: Low-temperature pyrolysis enables FeNi3 nanoparticle implanted N-doped carbon nanosheets as an efficient bifunctional electrocatalyst for overall water splitting
Source: Royal Society of Chemistry journal article supplement (doi:10.1039/d3ta01819a), 2023-01-01
Supplement: d3ta01819a1.pdf [file d3ta01819a1.pdf]

## Supporting Information

### Low-temperature pyrolysis enables the FeNi<sub>3</sub> nanoparticles implanted N-doped carbon nanosheets as an efficient bifunctional electrocatalyst for overall water splitting

*Rong Xin<sup>a</sup>, Yijiang Liu<sup>a\*</sup>, Xuxin Li<sup>a</sup>, Shicheng Yi<sup>a</sup>, Mingyue Zhang<sup>b</sup>, Hongbiao Chen<sup>a</sup>, Huaming Li<sup>a</sup>, and Zhiqun Lin<sup>b\*</sup>*

<sup>a</sup> College of Chemistry and Key Laboratory of Environmentally Friendly Chemistry and Application of Ministry of Education, Xiangtan University, Xiangtan 411105, Hunan Province, China

<sup>b</sup> Department of Chemical and Biomolecular Engineering, National University of Singapore, Singapore, 117585

#### Corresponding Authors

Y.J. Liu (liuyijiang84@xtu.edu.cn); Z.Q. Lin ([z.lin@nus.edu.sg](mailto:z.lin@nus.edu.sg))

#### 1. Characterization

Fourier transform infrared spectroscopy (FTIR, Nicolet 6700 spectrophotometer) and powder X-ray diffraction (XRD, Rigaku D/Max 2500PC diffractometer) were employed to characterize the chemical compositions and crystal structures of as-prepared samples. Furthermore, field-emission scanning electron microscope (SEM, JEOL S-4800) and transmission electron microscope (TEM, JEOL JEM-1011) were utilized to distinguish the shape of the as-prepared samples. The samples were

dropped on the silica plate and air-dried, and then observed at an accelerating voltage of 10 kV. The samples were dipped on the copper grids and air-dried, and the morphology was visualized by using TEM at an accelerating voltage of 100 kV. High-resolution transmission electron microscope (HRTEM) and elemental mapping analysis were measured by JEOL JEM-2100. The morphology of the samples was imaged by The X-ray photoelectron spectroscopy (XPS) was measured on a K-Alpha 1063 photoelectron spectrometer (Thermo Fisher Scientific, England) using Al-K $\alpha$  X-ray radiation as an excitation source. The porosity was characterized by nitrogen adsorption experiments at 77.3 K (Micromeritics Tri Star II 3020). Brunauer-Emmett-Teller (BET) method was used to calculate the specific surface area. The pore size distribution (PSD) was calculated from the adsorption branches of the isotherms using the DFT model.

## 2. Electrochemical measurements

The HER and OER performance was tested in 1.0 M KOH solution with the three-electrode system using CHI760D electrochemical workstation at room temperature. The Carbon paper supported active materials with a geometric area of 0.5 $\times$ 0.5cm was immersed into the solution as the working electrode. The loading mass of FeNi<sub>3</sub>/NCS on the carbon paper is 1.0 mg cm<sup>-2</sup>. A standard Hg/HgO electrode and graphite rod were served as the reference and counter electrodes, respectively. Notably, the mass loading of RuO<sub>2</sub> and 20 wt %Pt/C catalysts on the carbon paper is also 1.0 mg cm<sup>-2</sup>.

The working electrode was fabricated as follows: the catalyst ink was prepared by dispersing 4.0 mg of FeNi<sub>3</sub>/NCS or 20 wt % Pt/C or RuO<sub>2</sub> in a mixed solvents of deionized water (785  $\mu$ L), ethanol (200  $\mu$ L) and 5% nafion (15  $\mu$ L) under ultrasonication. Subsequently, 64  $\mu$ L of the catalyst ink was drop-cast onto a piece of clean carbon paper (0.5 cm  $\times$  0.5 cm), and the prepared electrode was dried under infrared light before electrochemical measurements.

Before OER and HER activity test, 1.0 M KOH electrolyte was saturated with O<sub>2</sub> and N<sub>2</sub> for at least 30 min to ensure the O<sub>2</sub> saturation and mitigate dissolved oxygen.

Prior to LSV test, the working electrode was pre-activated by 20 cycles of cyclic voltammetry (CV) scan. The potential ranges are from 0 V to 1.0 V for OER and from -1.8 V to 0 V for HER, respectively. The electrochemical impedance spectrum (EIS) test of the catalysts were carried out with a frequency range of 1 Hz to 10 kHz at the overpotential corresponding to the current density of 10 mA cm<sup>-2</sup>. To evaluate the activity of the obtain samples, the linear sweep voltammetry (LSV) was performed between 0 V to 1.0 V for OER, -0.8V to -1.5 V for HER at 5 mV s<sup>-1</sup>, respectively. All the LSV tests were performed with 80% iR compensation. The electrochemical surface area (ESCA) was estimated from the double-layer capacitance (C<sub>dl</sub>) of the electrocatalyst materials. The C<sub>dl</sub> was determined by a simple CV method. The CV was conducted at various scan rates of 20, 40, 60, 80 and 100 mV s<sup>-1</sup>. The stability of the catalyst was proved by chronopotentiometry.

TOF is another intrinsic activity parameter that could be derived from that current density at a fixed potential and the surface concentration or number of actually involved metal sites. However, getting an accurate TOF is always a difficult task unless the catalyst under study is a single-crystal electrocatalyst of well-faceted planes or a molecular electrocatalyst as several assumptions have to be made. To prove this, we have calculated the TOFs using the following equation:

$$TOF = j \cdot N_A / n \cdot F \cdot \Gamma$$

where  $j$  is the current density,  $N_A$  is the Avogadro number,  $n$  is the number of electron transferred for the evolution of a single O<sub>2</sub> molecule,  $F$  is the Faraday constant (96485 C·mol<sup>-1</sup>), and  $\Gamma$  is the surface concentration or the number of active sites.

Overall water splitting performance tests were performed using CHI760D electrochemical workstation with the FeNi<sub>3</sub>/NCS as both the cathode and anode catalyst. LSV measurement was carried out in 1.0 M KOH solution with a scan rate of 5 mV s<sup>-1</sup>. The overall waters plitting stability of the obtained samples was measured by chronoamperometry for 12 h at a constant potential of 1.53 V corresponding to the current density of 10 mA cm<sup>-2</sup>.

All measured potentials in this study were converted to RHE according to the following equation:

$$E_{RHE} = E_{Hg/HgO} + 0.098 + 0.0591pH$$

In overall water splitting, Faraday efficiency is calculated by the following equation:

$$FE\% = V_{experimental} / V_{theoretical}$$

The actual volume of H<sub>2</sub> and O<sub>2</sub> produced can be calculated by the drainage method, the theoretical volume of H<sub>2</sub> and O<sub>2</sub> produced can be calculated by the following equation:

$$V_{theoretical} = I \times t \times V_m / n \times F$$

where  $I$  (A) is the current of overall water splitting,  $t$  (s) is spent time of overall water splitting,  $V_m$  is the molar volume of gas at normal temperature and pressure (24.5 L mol<sup>-1</sup>, 298K, 101 kPa),  $n$  is the number of electrons required to electrolyze 1 mole gas (O<sub>2</sub>:  $n=4$ ; N<sub>2</sub>:  $n=2$ ),  $F$  is the faraday constant (96485 C mol<sup>-1</sup>).

### 3. DFT Calculation

#### 3.1 Construction of model

The FeNi<sub>3</sub> crystal structure has a space group of PM-3M with cell parameters of  $\alpha = \beta = \gamma = 90^\circ$ ,  $a = b = c = 3.51 \text{ \AA}$ , and the (111) plane was selected as the reaction crystal plane. We constructed a (5×5) FeNi<sub>3</sub> (111) model with cell parameters  $a = b = 9.92 \text{ \AA}$ ,  $c = 21.2 \text{ \AA}$  to calculate the catalysis ability. The supercell graphite structure was used with the random N-doping model where the lattice parameters,  $a = b = 9.85 \text{ \AA}$  and  $c = 16 \text{ \AA}$ . In addition, we replaced some carbon atoms in the supercell graphite model by Ni and Fe atoms (Ni:Fe=3:1) to construct FeNi<sub>3</sub> slab model. All the models were geometrically optimized, and the top two layers were allowed to relax.

#### 3.2 Computational methods

All the calculations are performed in the framework of the density functional theory with the projector augmented plane-wave method, as implemented in the Vienna ab initio simulation package. The generalized gradient approximation proposed by Perdew, Burke, and Ernzerhof is selected for the exchange-correlation

potential. The cut-off energy for plane wave is set to 520 eV. The energy criterion is set to  $10^{-5}$  eV in iterative solution of the Kohn-Sham equation. Spin-polarized calculations are adopted to explore the magnetic states of bulk structures. The Brillouin zone was sampled with allowed spacing between k points in  $0.1 \text{ \AA}^{-1}$ , with  $\Gamma$ -centered Monkhorst–Pack k-point grid. For the slab model calculations, the vacuum distance was carefully tested and set to be 12  $\text{\AA}$  to avoid the cell-to-cell interactions. All the structures are relaxed until the residual forces on the atoms have declined to less than  $0.01 \text{ eV/\AA}$ . The visualization of three-dimensional structures is employed by VESTA software.

The OER performance of the catalysts was assessed by the adsorption free energy change ( $\Delta G_{\text{rds}}$ ) of the intermediates by the following four-step elementary reactions in alkaline conductions.

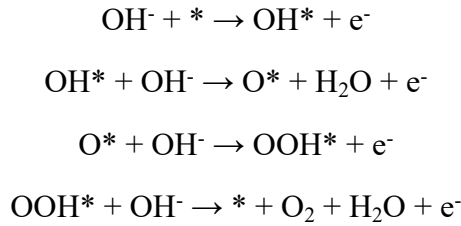

The Gibbs free energies of  $\Delta G_{\text{OH}^*}$ ,  $\Delta G_{\text{O}^*}$ ,  $\Delta G_{\text{OOH}^*}$  are defined based on the  $\text{OH}^*$ ,  $\text{O}^*$ ,  $\text{OOH}^*$  absorption on the electrocatalyst models, which are calculated according to the following equation:

$$\Delta G_{\text{ads}} = \Delta E_{\text{ads}} + \Delta E_{\text{ZPE}} - T\Delta S_{\text{ads}} - eU - kT \ln 10 \times \text{pH}$$

Where  $\Delta E_{\text{ads}}$  is the absorption energy,  $\Delta E_{\text{ZPE}}$  is the zero point energy calculated from the vibration frequency,  $\Delta S_{\text{ads}}$  is the entropy change,  $k$  is the boltzmann constant,  $T$  is the reaction temperature (300K),  $U$  represents the external bias voltage and  $\text{pH}$  is referred to as acidity. Here, for the standard alkaline conditions,  $\text{pH}=14$ ,  $U=0$ .

The overpotential  $\eta$  for OER reaction at a particular active site can be evaluated as the difference between  $\Delta G$  and the equilibrium potential ( $U=1.23 \text{ V}$ ):

$$\eta_{\text{OER}} = \max[\Delta G_1, \Delta G_2, \Delta G_3, \Delta G_4] / e - 1.23 \text{ V}$$

Similarly, the three steps of hydrogen evolution reaction (HER) process under alkaline conditions are considered to explore the electrocatalyst properties of

FeNi<sub>3</sub>/NCS, FeNi<sub>3</sub> and NCS.

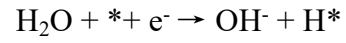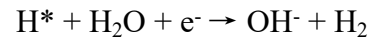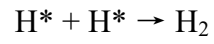

The differential charge density of FeNi<sub>3</sub>/NCS is defined by

$$\Delta\rho (\text{FeNi}_3/\text{NCS}) = \rho (\text{FeNi}_3/\text{NCS}) - \rho (\text{NCS})$$

where the  $\rho (\text{FeNi}_3/\text{NCS})$ ,  $\rho (\text{NCS})$  is the charge density of FeNi<sub>3</sub>/NCS, NCS, respectively.

#### 4. Figures

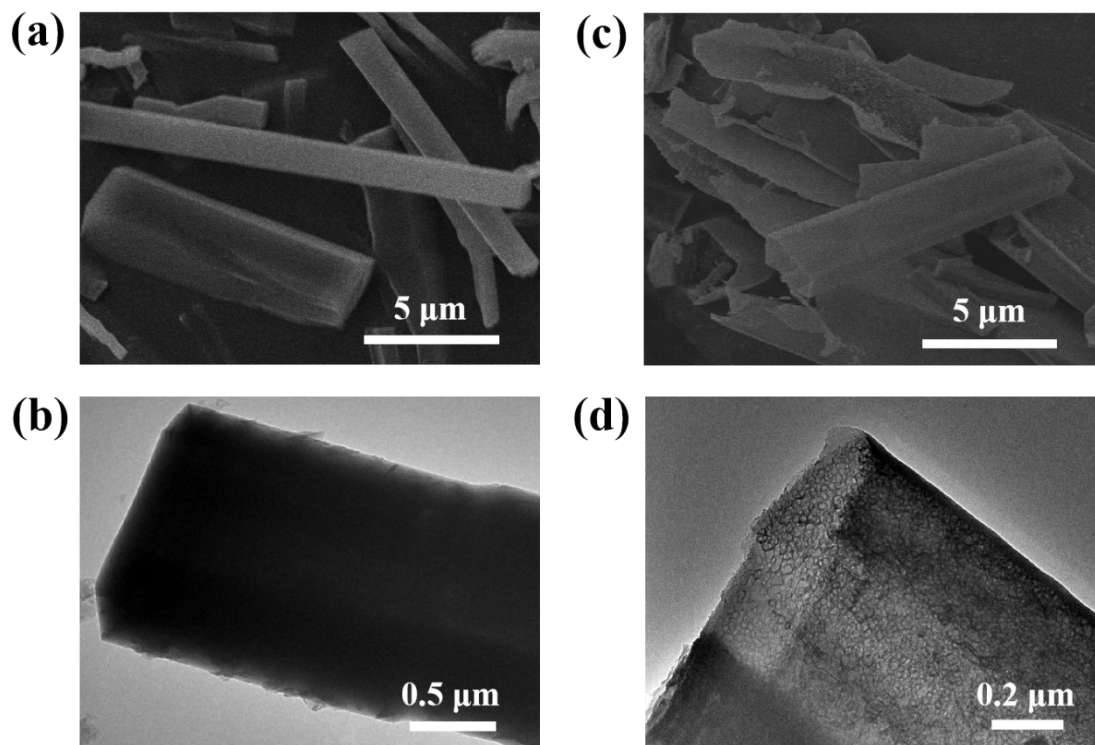

**Fig. S1.** SEM and TEM images of (a, b) Mel-T, (c, d) NCT.

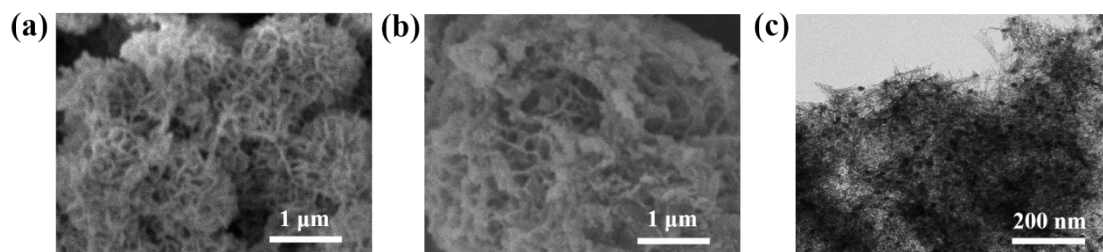

**Fig. S2.** (a) SEM of FeNi-LDH, and SEM (b) and TEM images (c) FeNiO/C.

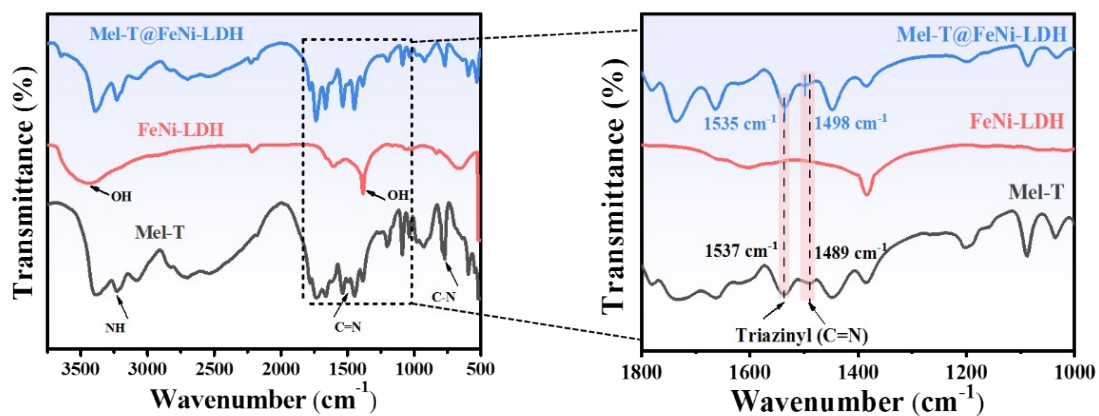

**Fig. S3.** The FTIR spectra of Mel-T, FeNi-LDH and Mel-T@FeNi-LDH.

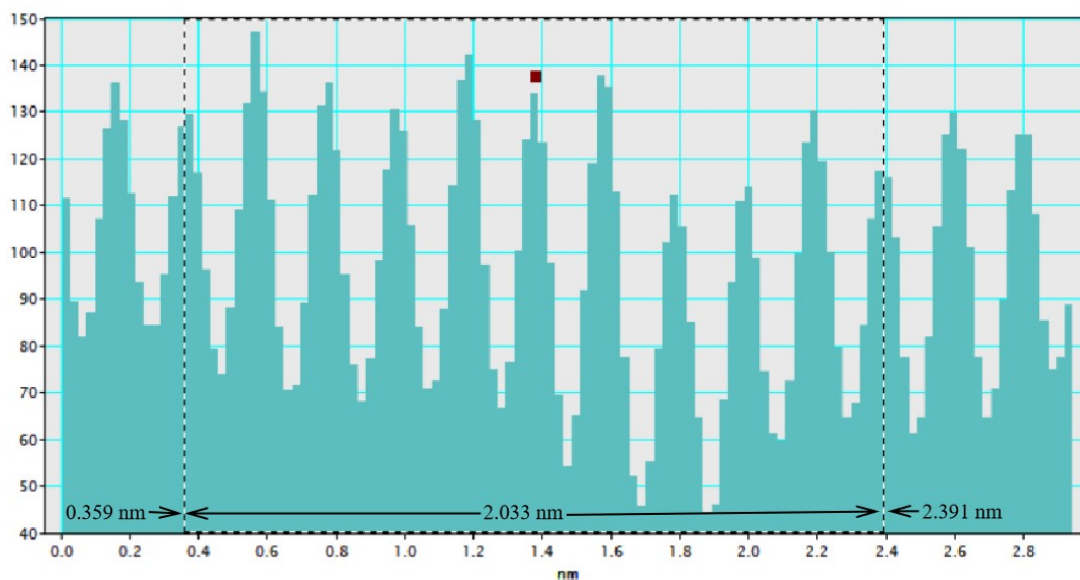

**Fig. S4.** The average lattice spacing of FeNi<sub>3</sub> (111) in the FeNi<sub>3</sub>/NCS electrocatalyst.

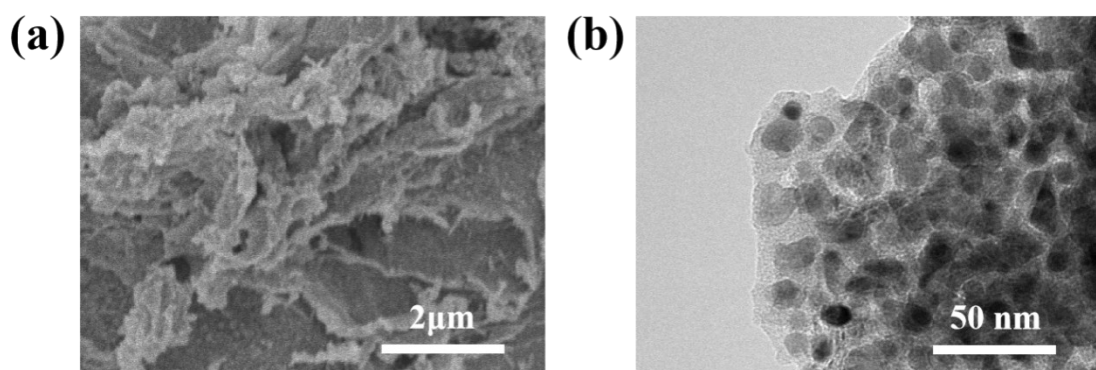

**Fig. S5.** SEM and TEM images of FeNi/NC.



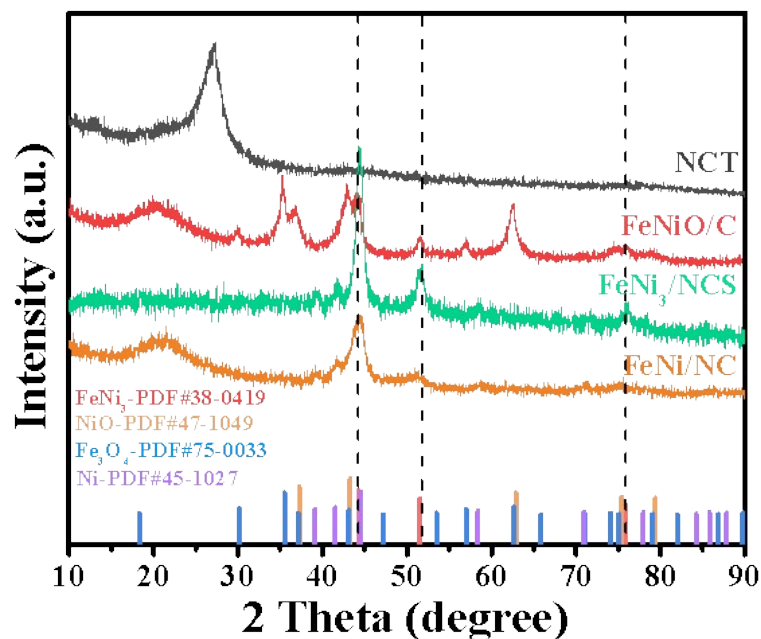

**Fig. S6.** XRD pattern of NCT, FeNiO/C, FeNi<sub>3</sub>/NCS, FeNi/NC.

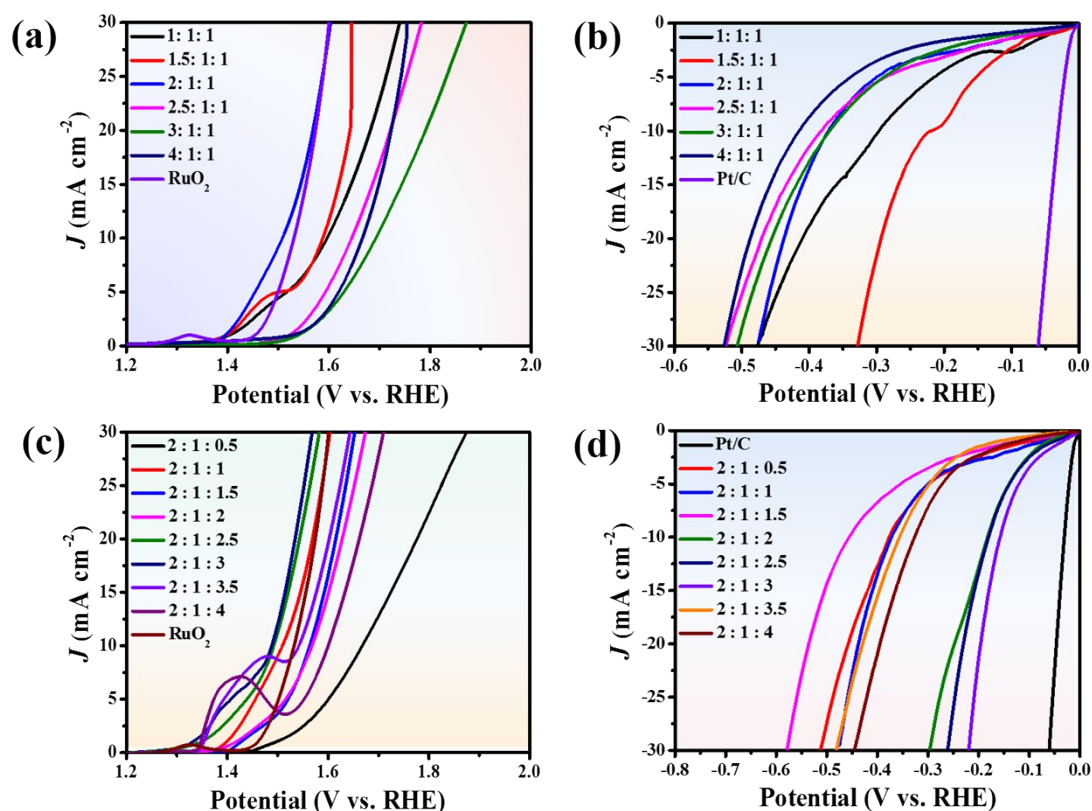

**Fig. S7.** (a) OER and (b) HER polarization curves of pyrolyzed Mel-T@FeNi-LDH with different mass ratios of melamine tube and metal salts; (c) OER and (d) HER polarization curves of pyrolyzed Mel-T@FeNi-LDH with different mass ratios of Fe<sup>3+</sup> and Ni<sup>2+</sup>.

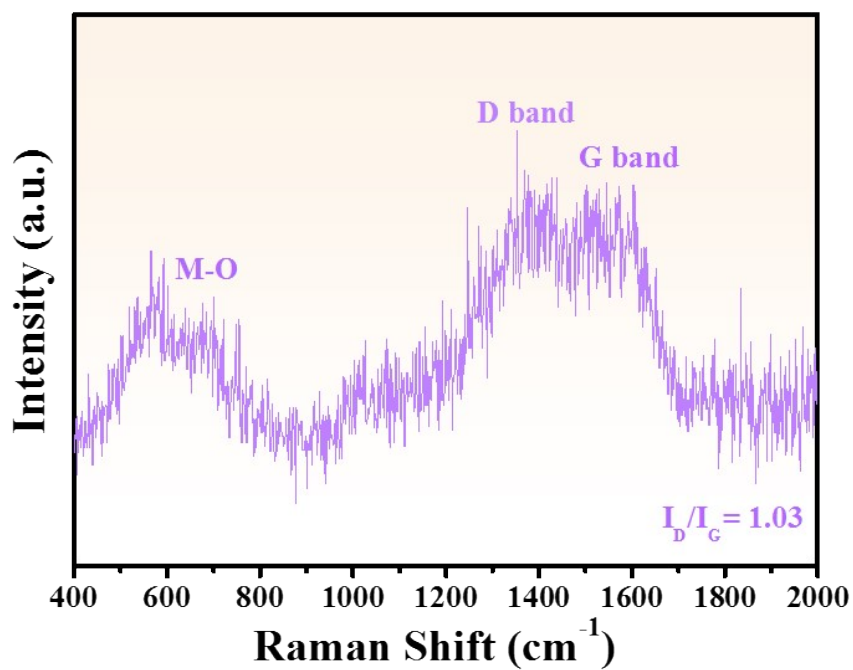

Fig. S8. Raman spectrum of FeNi<sub>3</sub>/NCS.

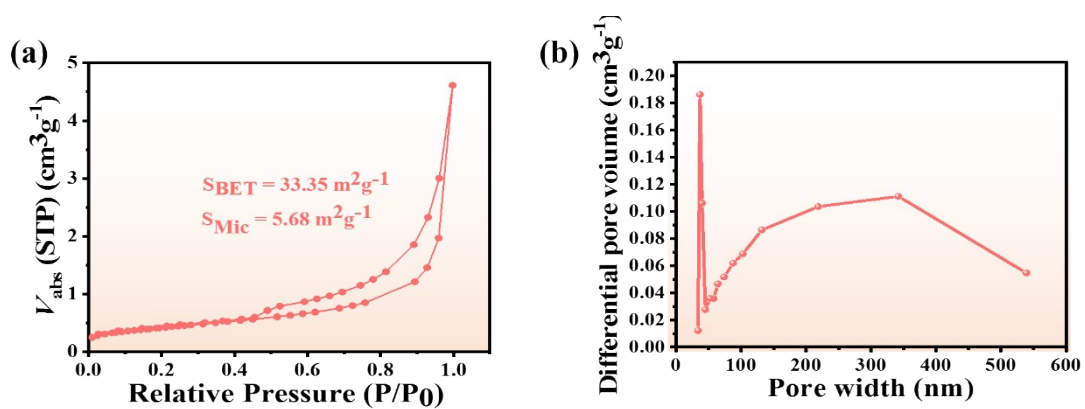

Fig. S9. (a) N<sub>2</sub> adsorption-desorption isotherms, and (b) pore size distribution of FeNi<sub>3</sub>/NCS.

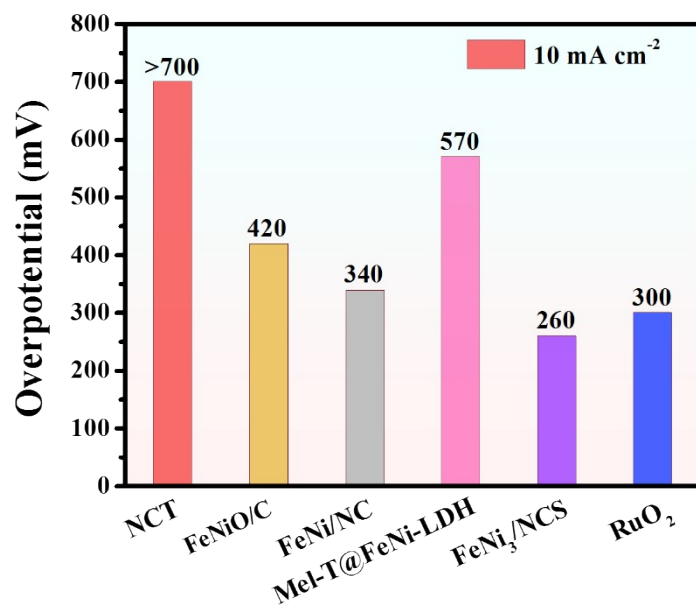

Fig. S10. OER overpotential at 10 mA cm<sup>-2</sup> of as-prepared samples.

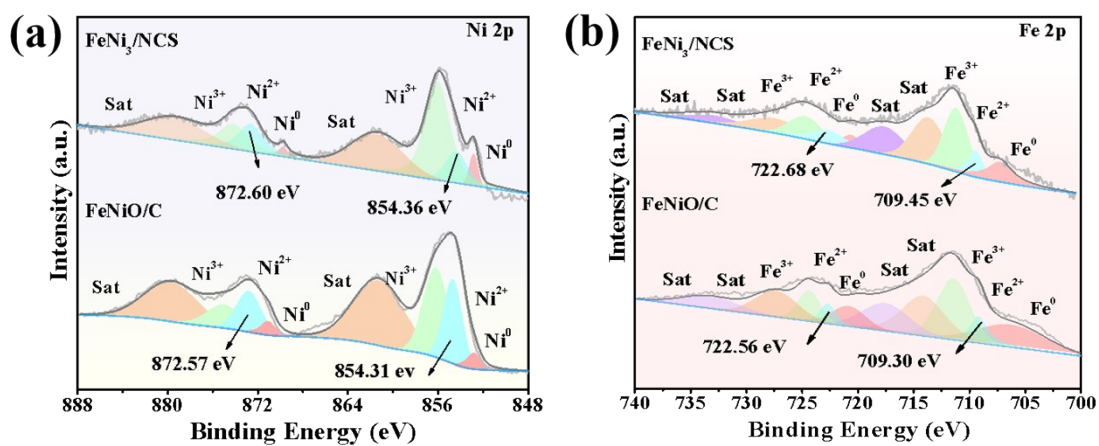

Fig. S11. High-resolution XPS spectra of (a) Ni 2p and (b) Fe 2p in FeNi<sub>3</sub>/NCS, FeNiO/C.

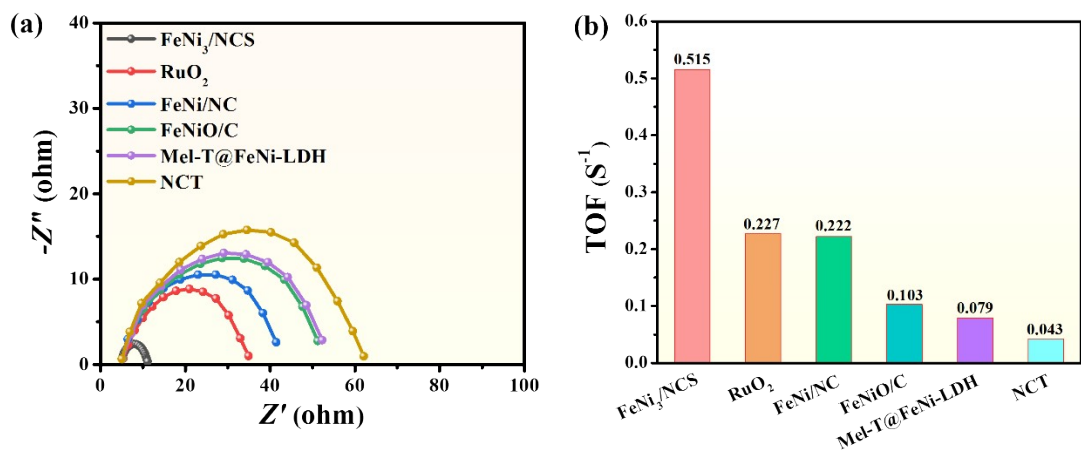

**Fig. S12.** (a) Nyquist plots, (b) TOF of FeNi<sub>3</sub>/NCS, NCT, FeNiO/C, FeNi/NC, Mel-T@FeNi-LDH and RuO<sub>2</sub> at 1.60 V.

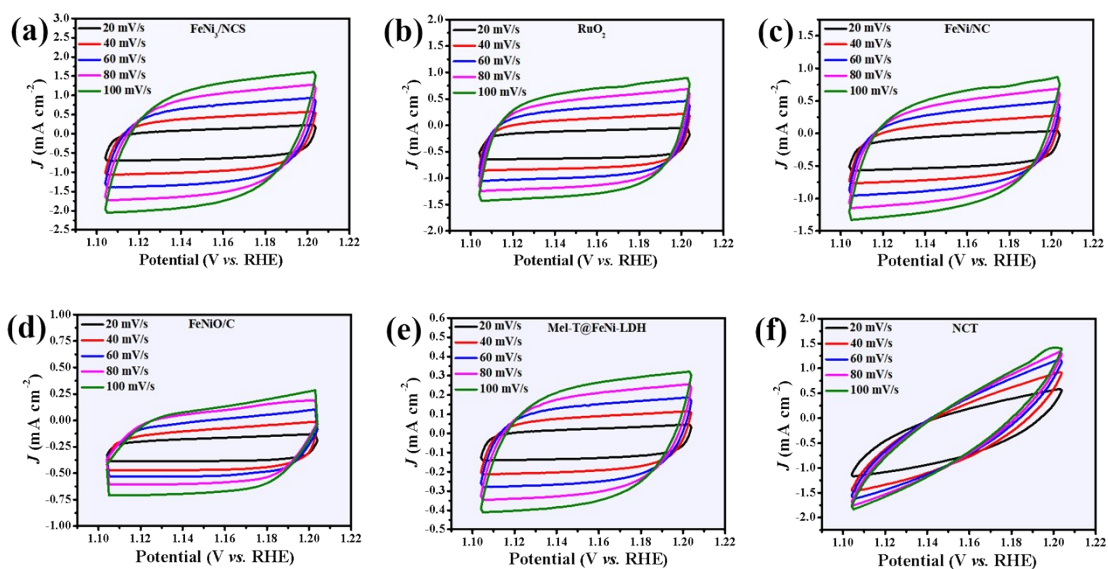

**Fig. S13.** Cyclic voltammetry (CV) curves of NCT, FeNiO/C, FeNi<sub>3</sub>/NCS, FeNi/NC, Mel-T@FeNi-LDH and RuO<sub>2</sub> in O<sub>2</sub>-saturated 1.0 M KOH solution at different scan rates.

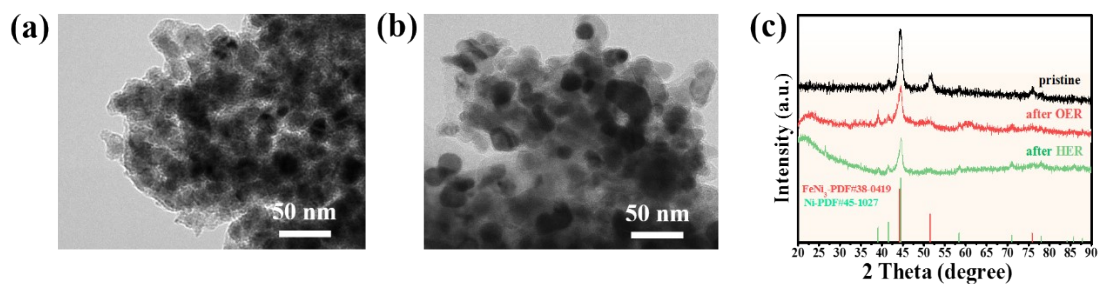

**Fig. S14.** TEM images of FeNi<sub>3</sub>/NCS after stability tests: (a) OER and (b) HER, and (c) XRD patterns after OER and HER stability testing.

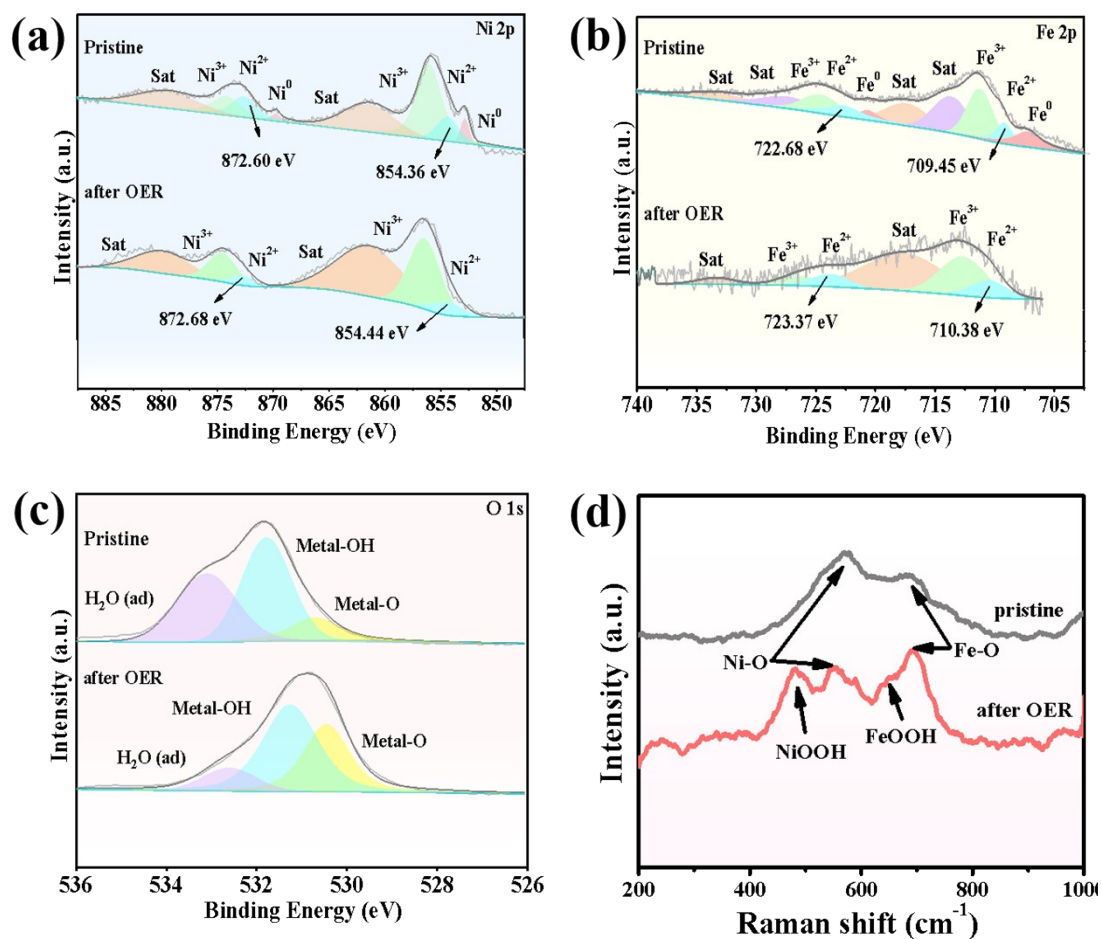

**Fig. S15.** High-resolution XPS spectra of (a) Ni 2p, (b) Fe 2p, (c) O 1s of FeNi<sub>3</sub>/NCS before and after OER stability test; (d) Raman spectrum of FeNi<sub>3</sub>/NCS before and after OER stability test.

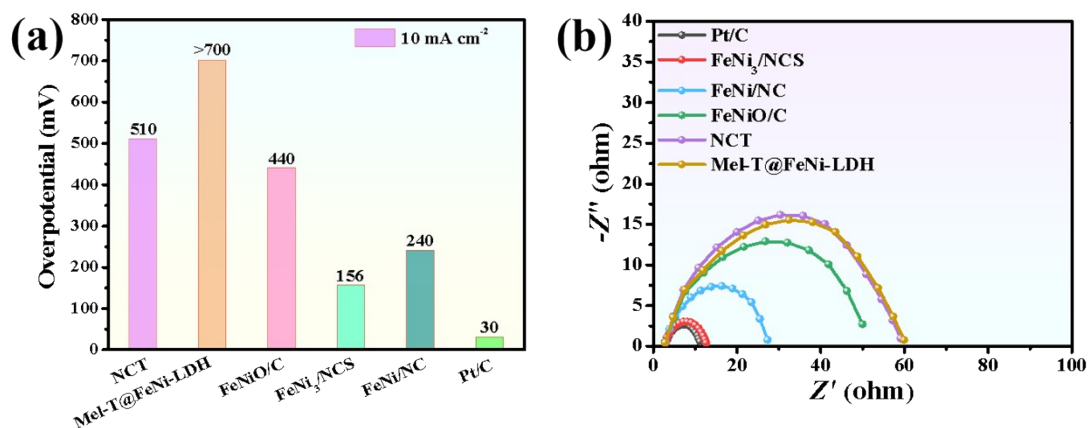

**Fig. S16.** (a) Overpotential at 10 mA cm<sup>-2</sup> of the as-prepared samples, (b) Nyquist plots of NCT, FeNiO/C, FeNi/NC, Mel-T@FeNi-LDH, FeNi<sub>3</sub>/NCS, and Pt/C.

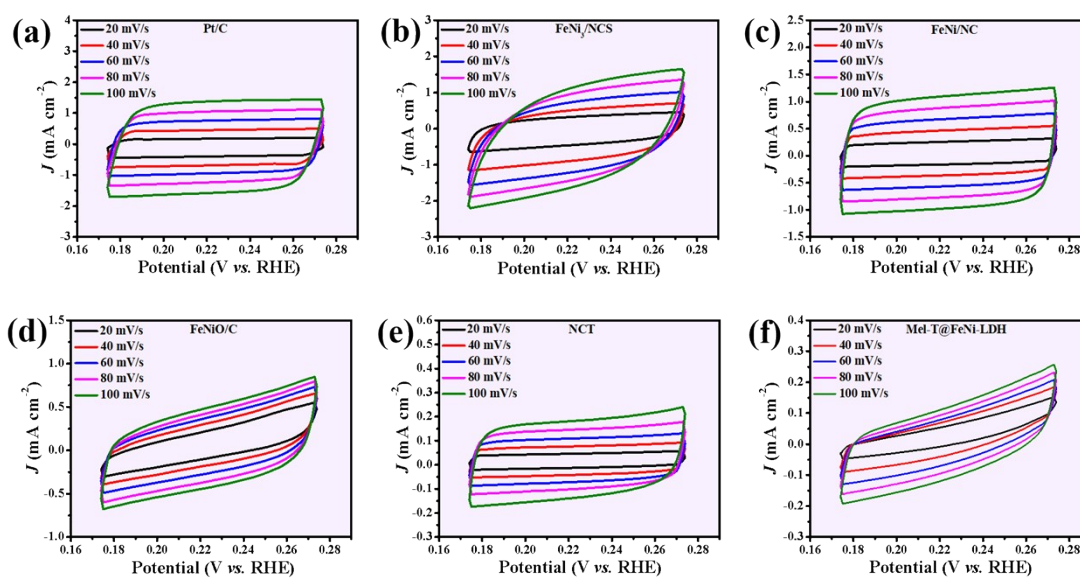

**Fig. S17.** Cyclic voltammetry (CV) curves of NCT, FeNiO/C, FeNi<sub>3</sub>/NCS, FeNi/NC, Mel-T@FeNi-LDH and Pt/C in N<sub>2</sub>-saturated 1.0 M KOH solution at different scan rates.

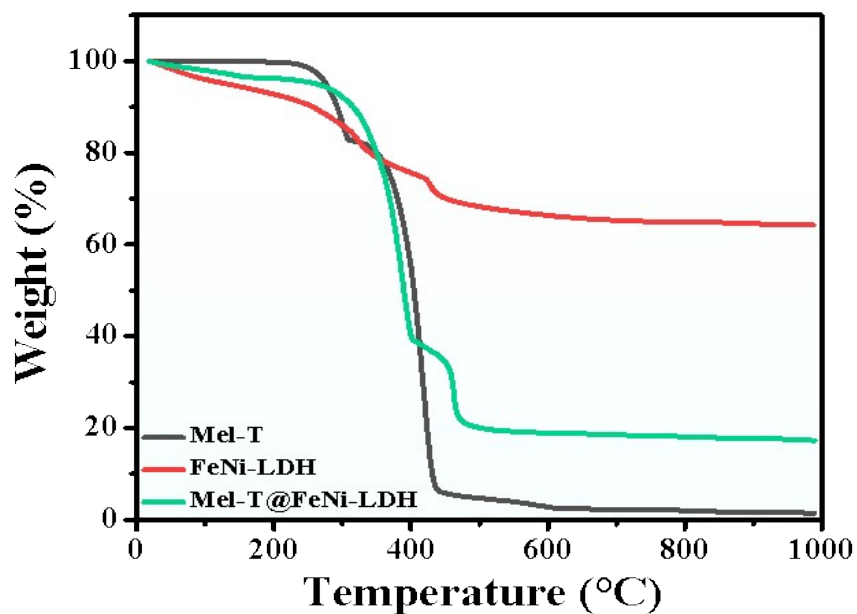

**Fig. S18.** TG curves of Mel-T, FeNi-LDH and Mel-T@FeNi-LDH.

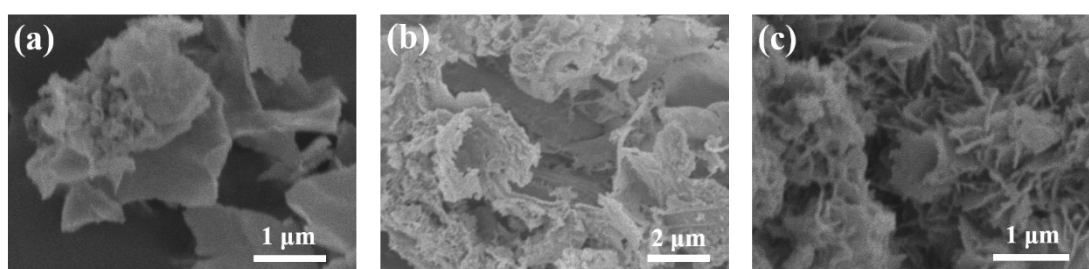

**Fig. S19.** SEM images of Mel-T@FeNi-LDH after pyrolysis at (a) 350 °C; (b) 400 °C h; and (c) 450 °C.

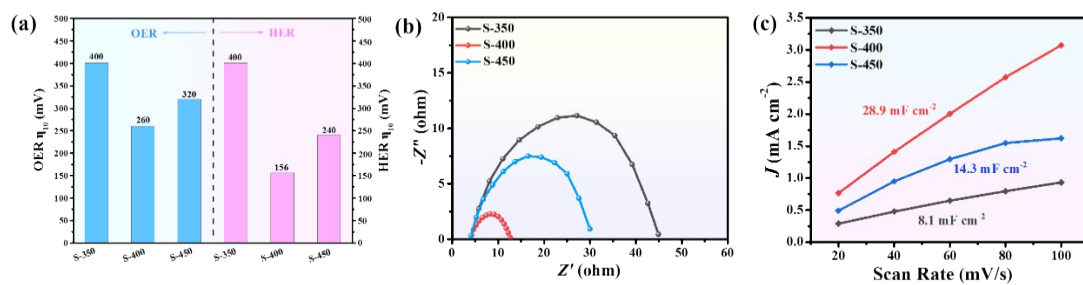

**Fig. S20.** (a) Overpotentials of HER and OER at different pyrolysis temperatures, (b) Nyquist plots, (c)  $C_{dl}$  of the carbonized samples.

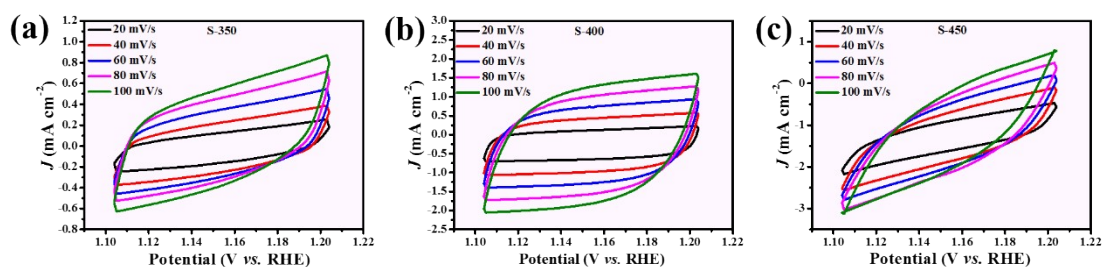

**Fig. S21.** Cyclic voltammetry (CV) curves of S-350, S-400 and S-450 in O<sub>2</sub>-saturated 1.0 M KOH solution at different scan rates.

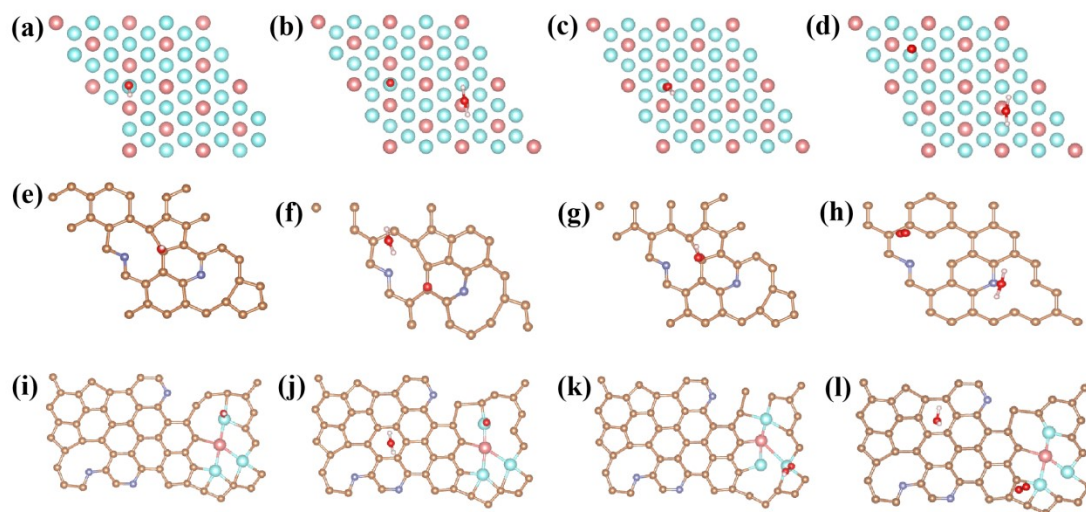

**Fig. S22.** The structure models of FeNi<sub>3</sub>, NCS and FeNi<sub>3</sub>/NCS after adsorbing (a) (e) (i) OH\*; (b) (f) (j) O\*; (c) (g) (k) OOH\*; (d) (h) (l) release of oxygen. Silver, green, pink, brown, blue, red and light pink balls indicate Ni, Fe, C, N, O and H atoms, respectively.



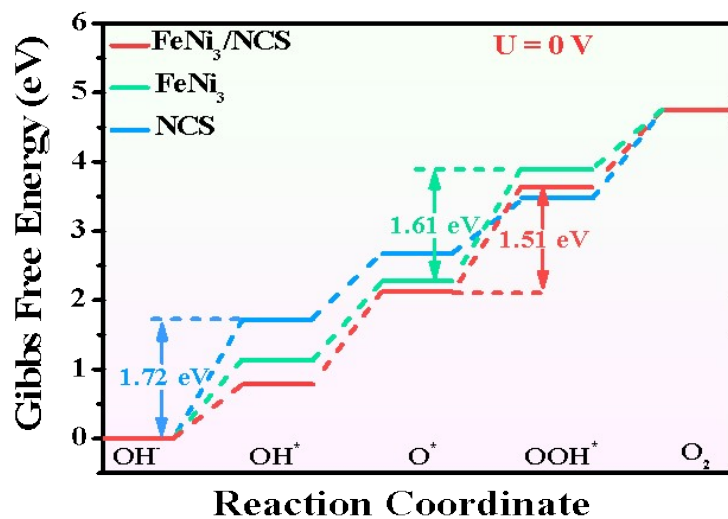

**Fig. S23.** The Gibbs free energy diagrams of NCS, FeNi<sub>3</sub> and FeNi<sub>3</sub>/NCS towards OER at U = 0 V.

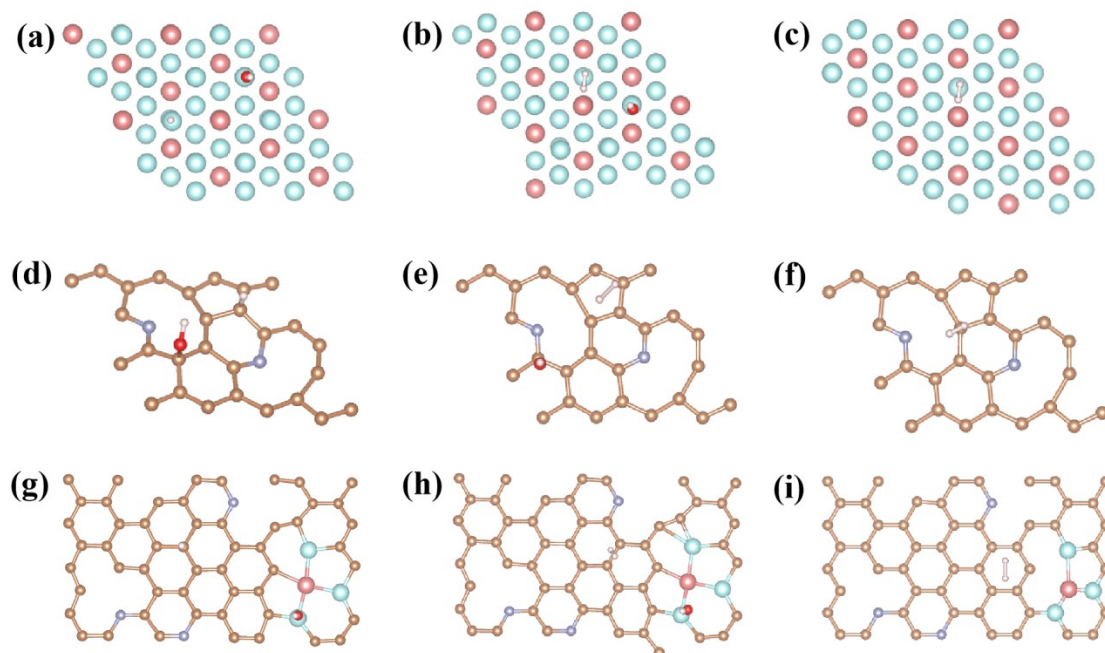

**Fig. S24.** (a) (d) (g) The structure models of FeNi<sub>3</sub>, NCS and FeNi<sub>3</sub>/NCS with Volmer reaction; (b) (c) (h) The structure models of FeNi<sub>3</sub>, NCS and FeNi<sub>3</sub>/NCS with Heyrovsky reaction; (c) (f) (i) The structure models of FeNi<sub>3</sub>, NCS and FeNi<sub>3</sub>/NCS with Tafel reaction.

## 5. Tables

**Table S1.** Comparison of OER performance of previous studies with this work in 1.0 M KOH solution.

| Catalyst                                                            | $\eta_{10}$ (mV) | $J$ (mA cm <sup>-2</sup> ) | References                                          |
|---------------------------------------------------------------------|------------------|----------------------------|-----------------------------------------------------|
| Ni <sub>1</sub> Co <sub>1</sub> -LDHs-E <sub>1</sub> D <sub>1</sub> | 260              | 10                         | <i>Sustainable Mater. Technol.</i> 2020, 25, e00170 |
| Ni <sub>3</sub> Fe/rGO                                              | 280              | 10                         | <i>Chem. Eng. J.</i> 2022, 451, 138548              |
| NiFe-LDH NSs                                                        | 280              | 10                         | <i>ACS Appl. Energy Mater.</i> 2019, 2, 5465-5471   |
| CoMoV LDH/NF                                                        | 270              | 10                         | <i>Chem. Comm.</i> 2019, 55, 3521-3524              |
| Ni <sub>3</sub> N-NiMoN                                             | 277              | 10                         | <i>Nano Energy</i> 2018, 44, 353-363                |
| Co/CNT/MCP                                                          | 270              | 10                         | <i>Carbon</i> 2020, 166, 284-290                    |
| CoP-NC@NFP                                                          | 270              | 10                         | <i>Chem. Eng. J.</i> 2022, 428, 131115              |
| H-CoSx@NiFe LDH/NF                                                  | 250              | 10                         | <i>Small</i> 2022, 2200586                          |
| MoS <sub>2</sub> /NiFe LDH                                          | 257              | 10                         | <i>Chinese Chem. Lett.</i> 2022, 33, 4761-4765      |
| Fe-Co-CN/rGO-700                                                    | 308              | 10                         | <i>Electrochim. Acta</i> 2021, 365, 137384          |
| Ni/NiS/NC                                                           | 337              | 10                         | <i>Int. J. Hydrogen Energy</i> 2019, 44, 2832       |
| Ni-Mo <sub>x</sub> C/NC                                             | 328              | 10                         | <i>ACS Appl. Mater. Interfaces</i> 2018, 10, 35025  |
| CoFe-LDH                                                            | 267              | 10                         | <i>ACS Appl. Energy Mater.</i> 2022, 5, 11483       |
| <b>FeNi<sub>3</sub>/NCS</b>                                         | <b>260</b>       | <b>10</b>                  | <b>This work</b>                                    |

**Table S2.** Comparison of HER performance of previous studies with this work in 1.0 M KOH solution.

| Catalyst                                                   | $\eta_{10}$ (mV) | $J$ (mA cm <sup>-2</sup> ) | References                                         |
|------------------------------------------------------------|------------------|----------------------------|----------------------------------------------------|
| CoFe@NiFe/NF                                               | 240              | 10                         | <i>Appl. Catal. B.</i> 2019, 253, 131-139          |
| Ni <sub>3</sub> Fe/rGO                                     | 264              | 10                         | <i>Chem. Eng. J.</i> 2022, 451, 138548             |
| NiFe LDH/(NiFe)S <sub>x</sub> /CMT                         | 157              | 10                         | <i>Electrochim. Acta</i> 2020 , 348, 136339        |
| CoMoV LDH/NF                                               | 150              | 10                         | <i>Chem. Comm.</i> 2019, 55, 3521-3524             |
| Cr-doped FeNi-P/NCN                                        | 190              | 10                         | <i>Adv. Mater.</i> 2019, 31, 1900178               |
| RuO <sub>2</sub> -Fe <sub>2</sub> O <sub>3</sub> /HrGO NSs | 239              | 10                         | <i>Int. J. Hydrogen Energ.</i> 2022,               |
| CoP-NC@NFP                                                 | 162              | 10                         | <i>Chem. Eng. J.</i> 2022, 428, 131115             |
| Fe-Co-CN/rGO-700                                           | 215              | 10                         | <i>Electrochim. Acta</i> 2021, 365, 137384         |
| Ni <sub>3</sub> S <sub>2</sub> /Cu-NiCo LDH/NF             | 156              | 10                         | <i>J. Mater. Chem. A</i> 2021, 9, 27639-27650      |
| Ni-Mo <sub>x</sub> C/NC                                    | 162              | 10                         | <i>ACS Appl. Mater. Interfaces</i> 2018, 10, 35025 |
| Ni-NiO@3DHPG                                               | 310              | 10                         | <i>Electrochim. Acta</i> 2019, 298, 163            |
| Fe <sub>3</sub> C-Co/NC                                    | 238              | 10                         | <i>Adv. Funct. Mater.</i> 2019, 29, 1901949        |
| <b>FeNi<sub>3</sub>/NCS</b>                                | <b>156</b>       | <b>10</b>                  | <b>This work</b>                                   |

**Table S3.** Comparison of overall water splitting performance with of previous studies and this work in 1.0 M KOH solution.

| Catalyst                                       | Cell voltage | Current density (mA cm <sup>-2</sup> ) | References                                         |
|------------------------------------------------|--------------|----------------------------------------|----------------------------------------------------|
| CoFe@NiFe/NF                                   | 1.59         | 10                                     | <i>Appl. Catal. B.</i> 2019, 253, 131-139          |
| Ir/Ni <sub>3</sub> Fe/rGO                      | 1.57         | 10                                     | <i>Chem. Eng. J.</i> 2022, 451, 138548             |
| CoMoV LDH/NF                                   | 1.61         | 10                                     | <i>Chem. Comm.</i> 2019, 55, 3521-3524             |
| Pd/NiFeO <sub>x</sub>                          | 1.57         | 10                                     | <i>Adv. Funct. Mater.</i> 2021, 31, 21071-21081    |
| CoSe <sub>2</sub> @CoNi-LDH HNA                | 1.58         | 10                                     | <i>Adv. Sci.</i> 2022, 9, 2104522                  |
| MoS <sub>2</sub> /NiFe LDH                     | 1.61         | 10                                     | <i>Chinese Chem. Lett.</i> 2022, 33, 4761-4765     |
| CoP-NC@NFP                                     | 1.57         | 10                                     | <i>Chem. Eng. J.</i> 2022, 428, 131115             |
| H-CoS <sub>x</sub> @NiFe LDH/NF                | 1.59         | 10                                     | <i>Small</i> 2022, 2200586                         |
| NiCoFe LDH/NF                                  | 1.56         | 10                                     | <i>Chem. Eng. J.</i> 2022, 433 134552              |
| Ni <sub>3</sub> S <sub>2</sub> /Cu-NiCo LDH/NF | 1.58         | 10                                     | <i>J. Mater. Chem. A</i> , 2021, 9, 27639-27650    |
| Cr-doped FeNi-P/NCN                            | 1.50         | 10                                     | <i>Adv. Mater.</i> , 2019, 31, 1900178             |
| CoFeNi-LDH                                     | 1.56         | 10                                     | <i>J. Power Sources</i> , 2022, 524, 231068        |
| Ni@NiFe LDH                                    | 1.53         | 10                                     | <i>J. Mater. Chem. A</i> , 2019, 7, 21722          |
| NiFe-MOF                                       | 1.57         | 10                                     | <i>Inorg. Chem. Front.</i> 2021, 8, 2889           |
| U-Fe-β-Ni(OH) <sub>2</sub> /NF                 | 1.58         | 10                                     | <i>ACS Appl. Mater. Interfaces</i> 2020, 12, 36208 |
| <b>FeNi<sub>3</sub>/NCS</b>                    | <b>1.53</b>  | <b>10</b>                              | <b>This work</b>                                   |

**Table S4.** Gibbs free energy change (G) of NCS, FeNi<sub>3</sub>, and FeNi<sub>3</sub>/ NCS at different potential during OER.

| $\Delta G$ (eV) | U = 0 V |                   |                        | U = 1.23 V |                   |                        |
|-----------------|---------|-------------------|------------------------|------------|-------------------|------------------------|
|                 | NCS     | FeNi <sub>3</sub> | FeNi <sub>3</sub> /NCS | NCS        | FeNi <sub>3</sub> | FeNi <sub>3</sub> /NCS |
| <b>Step 1</b>   | 1.7223  | 1.1292            | 0.7851                 | 0.4923     | -0.1008           | -0.4449                |
| <b>Step 2</b>   | 0.9529  | 1.1493            | 1.3401                 | -0.2771    | -0.0807           | 0.1101                 |
| <b>Step 3</b>   | 0.8071  | 1.6109            | 1.5064                 | -0.4229    | 0.3809            | 0.2764                 |
| <b>Step 4</b>   | 1.269   | 0.8619            | 1.1197                 | 0.039      | -0.3681           | -0.1103                |
